# Supplementary material for: APOBEC3B gene expression as a novel predictive factor for pathological complete response to neoadjuvant chemotherapy in breast cancer
Source: PubMed Central journal article supplement (PMC6078135; doi:10.18632/oncotarget.25495), 2018-07-17
Supplement: oncotarget-09-30513-s001.pdf [file oncotarget-09-30513-s001.pdf]

## APOBEC3B gene expression as a novel predictive factor for pathological complete response to neoadjuvant chemotherapy in breast cancer

### SUPPLEMENTARY MATERIALS

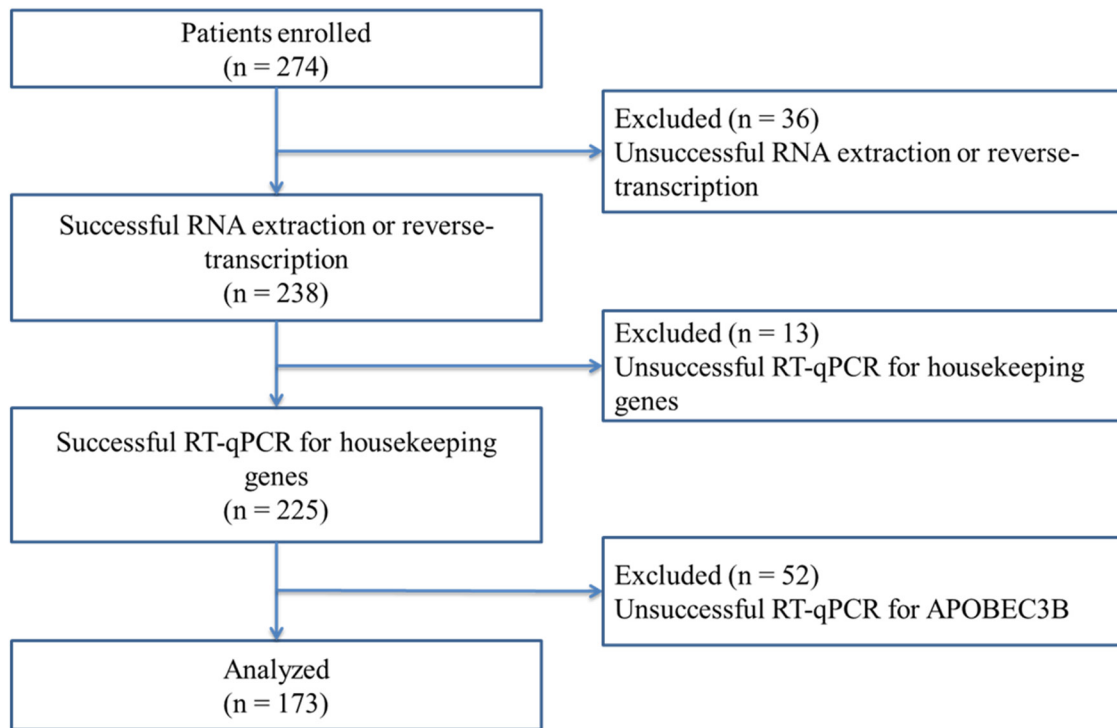

**Supplementary Figure 1: Diagram of patient enrollment and population analysis.** Two hundred and seventy-four primary breast cancer patients receiving NAC in more than 4 courses and undergoing surgery at our institute were enrolled in this retrospective study.

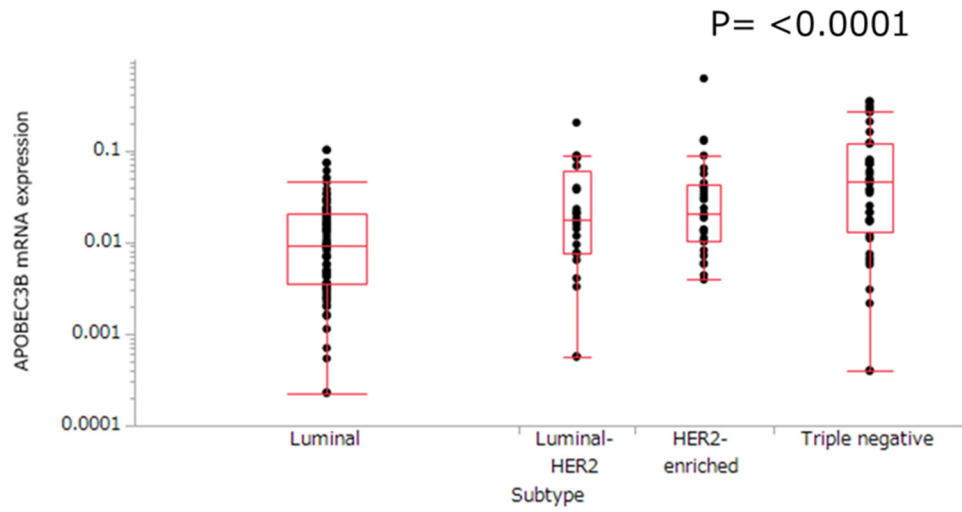

**Supplementary Figure 2: Correlation between APOBEC3B mRNA expression and subtypes.** Relationship of APOBEC3B mRNA expression with subtypes verified by the Wilcoxon test. Luminal (ER+ and/or PgR+, HER2-), Luminal-HER2 (ER+ and/or PgR+, HER2+), HER2-enriched (ER- and PgR-, HER2+), Triple negative (ER-, PgR- and HER2-).

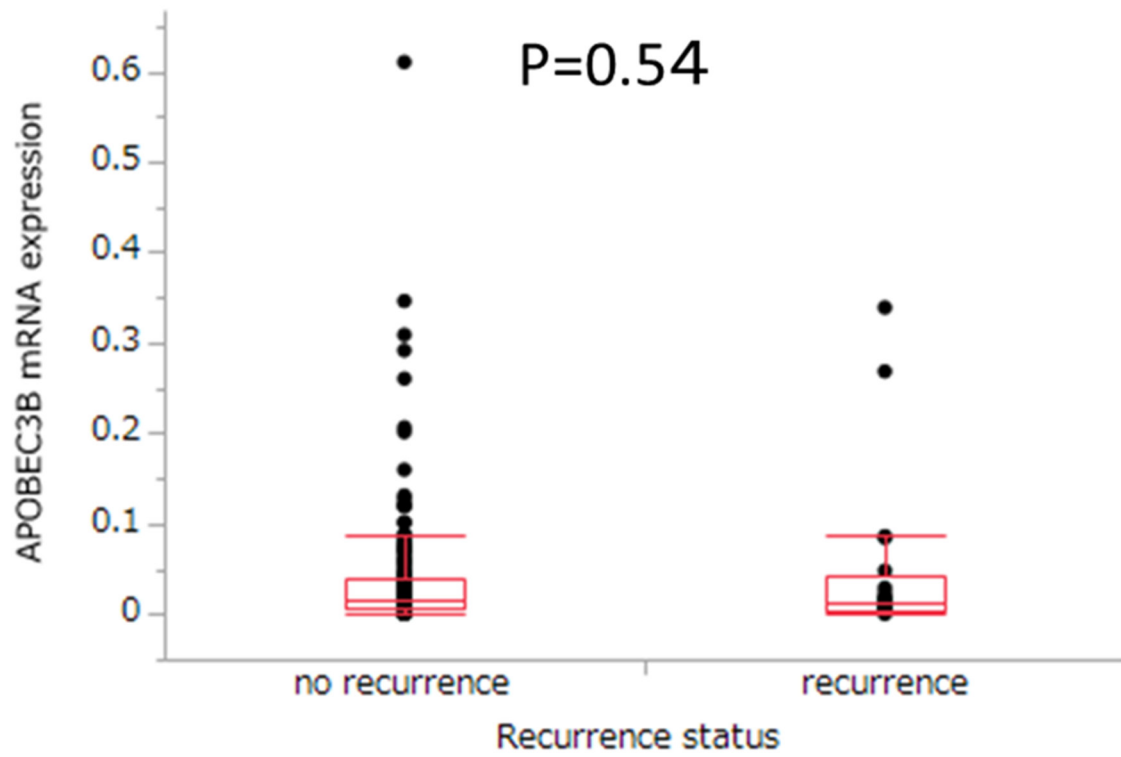

**Supplementary Figure 3: Correlation between APOBEC3B mRNA expression and recurrence.** Relationship of APOBEC3B mRNA expression with recurrence verified by the Wilcoxon test.

**Supplementary Table 1: Patient clinicopathological characteristics (n = 173)**

| Characteristics                    | Number of patients (%) |
|------------------------------------|------------------------|
| Age at biopsy                      |                        |
| <50                                | 71 (41.0%)             |
| ≥50                                | 102 (59.0%)            |
| Median (range)                     | 53 (24-78)             |
| Menopausal status                  |                        |
| Premenopausal                      | 72 (41.6%)             |
| Postmenopausal                     | 101 (58.4%)            |
| Tumor size (mm)                    |                        |
| <20                                | 29 (16.8%)             |
| ≥20                                | 144 (83.2%)            |
| Nuclear Grade                      |                        |
| 1                                  | 34 (19.7%)             |
| 2                                  | 63 (36.4%)             |
| 3                                  | 76 (43.9%)             |
| Ki67 labeling index                |                        |
| <20                                | 26 (15.0%)             |
| ≥20                                | 147 (85.0%)            |
| Median (range)                     |                        |
| Nodal status                       |                        |
| Negative                           | 51 (29.5%)             |
| Positive                           | 122 (70.5%)            |
| Stage                              |                        |
| I                                  | 12 (7.8%)              |
| II                                 | 108 (64.1%)            |
| III                                | 53 (28.1%)             |
| Tumor subtype                      |                        |
| ER+/HER2-                          | 79 (45.6%)             |
| ER+/HER2+                          | 24 (13.9%)             |
| ER-/HER2+                          | 29 (16.8%)             |
| ER-/HER2-                          | 41 (23.7%)             |
| Neoadjuvant chemotherapy treatment |                        |
| Anthracycline and taxane           | 110 (63.6%)            |
| Docetaxel and cyclophosphamide     | 10 (5.8%)              |
| Trastuzumab and chemotherapy       | 38 (22.0%)             |
| Other                              | 15 (8.6%)              |
| Adjuvant chemotherapy treatment    |                        |
| Only endocrine therapy             | 79 (45.6%)             |
| Endocrine therapy and trastuzumab  | 24 (13.9%)             |
| Only trastuzumab                   | 29 (16.8%)             |
| None                               | 41 (23.7%)             |
| pCR status                         |                        |
| pCR                                | 63 (36.4%)             |
| non-pCR                            | 110 (63.6%)            |

ER; estrogen receptor, PgR; progesteron receptor, HER2; human epidermal growth factor 2, SD; standard deviation, pCR; pathological complete response.
